# Supplementary material for: Incorporation of Cl into sequentially deposited lead halide perovskite films for highly efficient mesoporous solar cells
Source: Royal Society of Chemistry journal article supplement (doi:10.1039/c4nr04007d), 2014-01-01
Supplement: c4nr04007d1.pdf [file c4nr04007d1.pdf]

Cite this: DOI: 10.1039/c0xx00000x

www.rsc.org/xxxxxx

## Supporting Information

### Incorporation of Cl in sequentially deposited lead halide perovskite films for highly efficient mesoporous solar cells.

Sabba Dharani<sup>a,b</sup>, Herlina Arianita Dewi<sup>b</sup>, Rajiv Ramanujam Prabhakar<sup>b</sup>, Tom Baikie<sup>b</sup>, Chen Shi<sup>c</sup>, Du Yonghua<sup>d</sup>, Nripan Mathews<sup>a,b,e</sup>, Pablo P. Boix<sup>b\*</sup>, Subodh G. Mhaisalkar<sup>a,b\*</sup>

<sup>5</sup> Received (in XXX, XXX) Xth XXXXXXXXXX 20XX, Accepted Xth XXXXXXXXXX 20XX  
DOI: 10.1039/b000000x

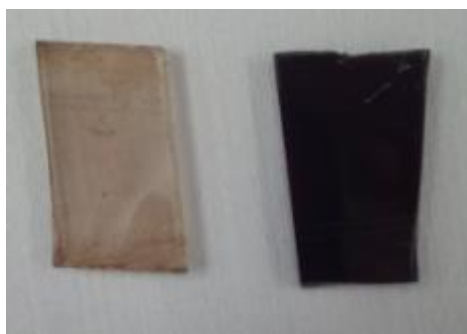

Fig.S1 On the left is the sample with PbCl<sub>2</sub> in MAI while the one on the right is that of PbI<sub>2</sub> + PbCl<sub>2</sub> in MAI.

10

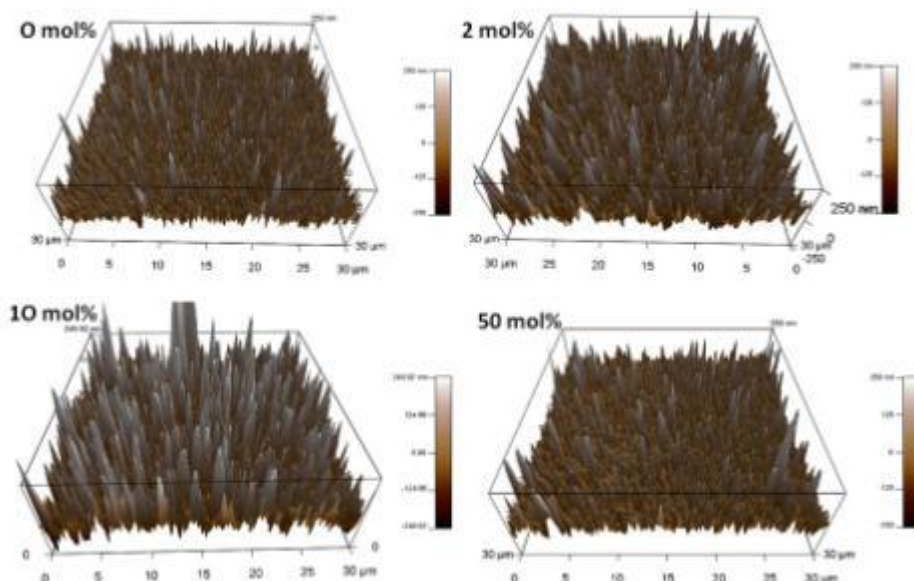

Fig.S2 AFM images illustrating the effect of Cl addition to CH<sub>3</sub>NH<sub>3</sub>PbI<sub>3</sub> on surface roughness of the films.

Cite this: DOI: 10.1039/c0xx00000x

www.rsc.org/xxxxxx

## Supporting Information

Table. S1 Effect of addition of Cl on lattice parameters of perovskite crystal structure

| Sample                     | a (Å)      | b (Å)      | c (Å)       |
|----------------------------|------------|------------|-------------|
| 0 mol % PbCl <sub>2</sub>  | 8.8811(7)  | 8.8811(7)  | 12.6807(19) |
| 2 mol % PbCl <sub>2</sub>  | 8.8859(6)  | 8.8859(6)  | 12.6936(18) |
| 50 mol % PbCl <sub>2</sub> | 8.8767(12) | 8.8767(12) | 12.6910(50) |

From the AFM surface roughness characterization it was observed that with increasing concentration of PbCl<sub>2</sub>, the surface roughness of the sample increased as indicated by the increasing density of sharp peaks in Fig. S2 and Table S1. However for 50 mol % of PbCl<sub>2</sub>, the surface roughness was measured to be similar to the 0 mol % PbCl<sub>2</sub>. This could be explained by the vertical growth of all the crystals leading to homogeneous roughness. The increase in the growth of the crystals could be validated from the FESEM cross-section image (Fig. S3).

Table. S2 Effect of addition of Cl on surface roughness of perovskite film

| Sample                     | Surface roughness (nm) |
|----------------------------|------------------------|
| 0 mol % PbCl <sub>2</sub>  | 52.74                  |
| 2 mol % PbCl <sub>2</sub>  | 70.20                  |
| 10 mol % PbCl <sub>2</sub> | 97.9                   |
| 50 mol % PbCl <sub>2</sub> | 53.34                  |

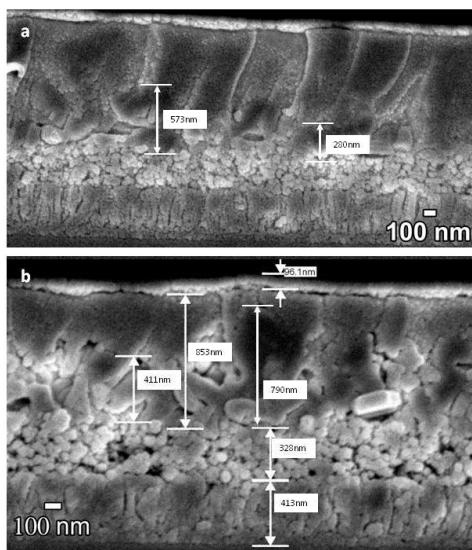Fig.S3 Cross-section FESEM image illustrating the height of the perovskite layer for 50 mol % of PbCl<sub>2</sub> addition.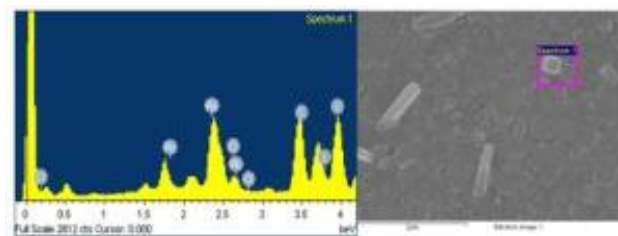Fig.S4 EDX demonstrating the presence of Cl peaks for 50 mol % PbCl<sub>2</sub> addition to methyl ammonium lead iodide.Table. S3 J-V characteristics of 20 mol % of PbCl<sub>2</sub>

| Sample                     | J <sub>sc</sub> (mA/cm <sup>2</sup> ) | V <sub>oc</sub> (V) | FF   | η (%) |
|----------------------------|---------------------------------------|---------------------|------|-------|
| 20 mol % PbCl <sub>2</sub> | 18.38                                 | 0.98                | 0.46 | 8.18  |

From Table. S3, we can observe that for Cl concentration > 10 mol %, the efficiency of the solar cell degrades considerably.

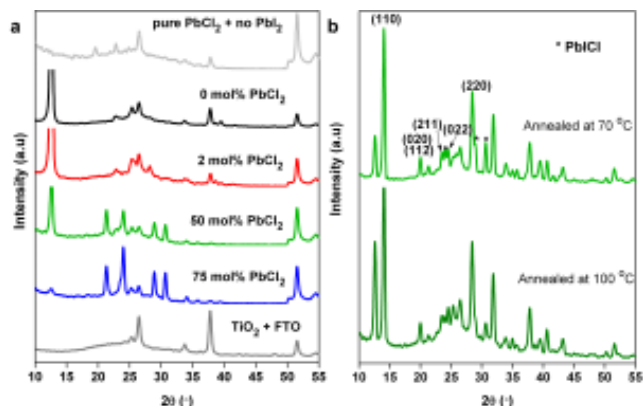Fig.S5 (a) XRD patterns of the samples after spin-coating PbI<sub>2</sub> or (PbI<sub>2</sub>+PbCl<sub>2</sub>). (b) Comparison of the XRD patterns of CH<sub>3</sub>NH<sub>3</sub>PbI<sub>3-x</sub>Cl<sub>x</sub> (x = 0.05) for different annealing conditions.

It was observed from Fig. S5a, that during the first step of inorganic halide deposition itself for Cl concentrations > 2 mol %, additional peaks were observed. Also the annealing temperature had no effect on the diffraction patterns as was observed in Fig. S5b.

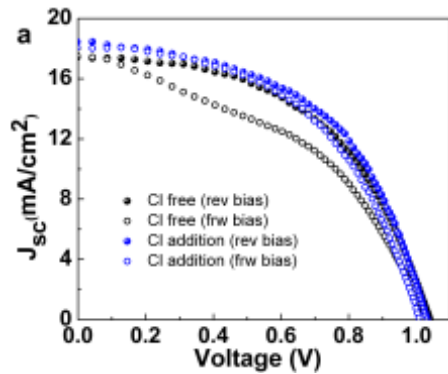

Fig.S6 Effect of Cl on hysteresis for different scan speeds.

10 Table. S3 Hysteresis Index extracted from data in Fig 5(c&d) for different scan rates.

| Delay between points | 0 mol % PbCl <sub>2</sub> | 10 mol% PbCl <sub>2</sub> |
|----------------------|---------------------------|---------------------------|
| 0.1 s                | 0.13                      | 0.02                      |
| 0.05 s               | 0.17                      | 0.03                      |
